Development 133, 4607 (2006) doi:10.1242/dev.02692

## Small molecule-induced ablation and subsequent regeneration of larval zebrafish melanocytes

**Chao-Tsung Yang and Stephen L. Johnson**

There was an error published in *Development* **133**, 3563-3573.

The chemical name for MoTP used in this study should be 4-(4-morpholinobutylthio)phenol, rather than (2-morpholinobutyl)-4-thiophenol, which specifies a different chemical structure. The structure for MoTP shown in Fig. 4A remains correct.

The authors apologise to readers for this mistake.
